# Supplementary material for: Atmospheric breakdown kinetics and air quality impact of potential “green” solvents, the oxymethylene ethers OME3 and OME4
Source: Copernicus journal article supplement (doi:10.5194/acp-25-9169-2025), 2025-08-22
Supplement: Supplementary file 1 [file acp-25-9169-2025-supplement.zip]

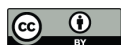

## *Supplement of*

# **Atmospheric breakdown kinetics and air quality impact of potential “green” solvents, the oxymethylene ethers OME3 and OME4**

**James D’Souza Metcalf et al.**

*Correspondence to:* Iustinian G. Bejan ([iustinian.bejan@uaic.ro](mailto:iustinian.bejan@uaic.ro)) and Terry J. Dillon ([terry.dillon@york.ac.uk](mailto:terry.dillon@york.ac.uk))

- [acp-25-9169-2025-supplement-title-page.pdf](#)
- SI New
  - S1-S5a Supplementary Information.pdf
  - S5b Raw files from calculations
    - \* COSMO-RS
    - \* Gaussian

The copyright of individual parts of the supplement might differ from the article licence.
