# Supplementary material for: Atmospheric breakdown kinetics and air quality impact of potential “green” solvents, the oxymethylene ethers OME3 and OME4
Source: Copernicus journal article supplement (doi:10.5194/acp-25-9169-2025), 2025-08-22
Supplement: Supplementary file 2 [file acp-25-9169-2025-supplement.zip]

# Atmospheric breakdown kinetics and air quality impact of potential “green” solvents the oxymethylene ethers OME3 and OME4

## Supplementary Information (S1-5a)

James D. D’Souza Metcalf<sup>1,2</sup>, Ruth K. Winkless<sup>1</sup>, Caterina Mapelli<sup>1,2,3</sup>, C. Rob McElroy<sup>2,4</sup>, Claudiu Roman<sup>5,6</sup>, Cecilia Arsene<sup>5,6,7</sup>, Romeo I. Olariu<sup>5,6,7</sup>, Iustinian G. Bejan<sup>5,7</sup> and Terry J. Dillon<sup>1</sup>.

<sup>1</sup>Wolfson Atmospheric Chemistry Laboratories, Department of Chemistry, University of York, York, YO10 5DD, UK.

<sup>2</sup>Green Chemistry Centre of Excellence, Department of Chemistry, University of York, York, YO10 5DD, UK

<sup>3</sup>now at: National Research Council - Institute of Methodologies for Environmental Analysis (IMAA), Tito Scalo, Potenza, 85050, Italy

<sup>4</sup>now at: Department of Chemistry, School of Natural Sciences, University of Lincoln, Brayford Pool, Lincoln, LN6 7TS, UK

<sup>5</sup>Faculty of Chemistry, “Alexandru Ioan Cuza” University of Iasi, 700506, Iasi, Romania

<sup>6</sup>Research Center with Integrated Techniques for Atmospheric Aerosol Investigation in Romania (RECENT-AIR), “Alexandru Ioan Cuza” University of Iasi, 11th Carol I, Iasi, 700506, Romania

<sup>7</sup>Integrated Center of Environmental Science Studies in the North Eastern Region – CERNESIM, “Alexandru Ioan Cuza” University of Iasi, 700506, Iasi, Romania

Correspondence to: Terry J. Dillon (terry.dillon@york.ac.uk) and Iustinian G. Bejan (iustinian.bejan@uaic.ro)

# Table of Contents

## Contents

|                                                                                                              |    |
|--------------------------------------------------------------------------------------------------------------|----|
| S1 – OME Characterisation Data .....                                                                         | 3  |
| S1.2 – Procedures.....                                                                                       | 3  |
| S1.2 – OME3 (2,4,6,8-tetraoxanonane, $\text{CH}_3\text{O}(\text{CH}_2\text{O})_3\text{CH}_3$ ) .....         | 3  |
| S1.3 – OME4 (2,4,6,8,10-Pentaoxaundecane, $\text{CH}_3\text{O}(\text{CH}_2\text{O})_4\text{CH}_3$ ) .....    | 6  |
| S1.4 – OME5 (2,4,6,8,10,12-hexaoxatridecane, $\text{CH}_3\text{O}(\text{CH}_2\text{O})_5\text{CH}_3$ ) ..... | 8  |
| S2 – Relative Rate Plots .....                                                                               | 11 |
| S2.1 – OME3 + OH (R3).....                                                                                   | 11 |
| S2.2 – OME4 + OH (R4).....                                                                                   | 11 |
| S2.3 – OME3 + Cl (R5) .....                                                                                  | 12 |
| S2.4 – OME4 + Cl (R6) .....                                                                                  | 12 |
| S3 – Gaussian Estimated Spectra .....                                                                        | 12 |
| S3.1 – OME3 Estimated Spectrum .....                                                                         | 13 |
| S3.2 – OME4 Estimated Spectrum .....                                                                         | 14 |
| S4 – COSMO-RS Validation.....                                                                                | 16 |
| S5a – Details of included files .....                                                                        | 18 |
| S5a.1 Gaussian Files .....                                                                                   | 18 |
| S5a.2 COSMO-RS Files .....                                                                                   | 18 |

# S1 – OME Characterisation Data

## S1.2 – Procedures

### APCI-MS

Mass spectra were taken on a Bruker MicroTOF time of flight mass spectrometer fitted with and APCI II ionisation source. Samples were diluted *quantum satis* in dichloromethane (Fischer Scientific, 99.8%, HPLC Grade) and introduced *via* a syringe pump.

The APCI source was run in positive mode and spectra were scanned between  $m/z = 50 - 1000$ . The capillary voltage was 4500V and the corona was 5000 nA. The nebuliser gas pressure was 2.1 bar. The dry gas heater was set to 250 °C with a flow rate of 2 l min<sup>-1</sup>. The vaporiser temperature was 400 °C.

The instrument was calibrated using a calibration solution (SCIEX, part number 4460131).

### NMR

NMR spectra were taken at room temperature in Chloroform-d (Apollo Scientific, >99.8% D atom count) on a JEOL ECS400 instrument operating at a nominal proton frequency of 400 MHz. Samples were spun at 20 Hz. Spectra were referenced to the residual chloroform peak (7.26 ppm for <sup>1</sup>H spectra, 77.16 ppm for <sup>13</sup>C spectra)

### GC-FID

Gas chromatographic measurements were made with an Agilent Technologies HP 6890N gas chromatograph, with a flame ionisation detector (GC-FID), fitted with a Restex Stabilwax capillary column (30 m 250 mm x 0.25 mm nominal, max temperature 260°C). Hydrogen was used as the carrier gas at a flow rate of 0.8 mL min<sup>-1</sup> (10.1 psi) with a split ratio of 15:1 and a 0.5 µl injection.

The initial oven temperature was 50 °C and was increased instantly at a rate of 20 °C min<sup>-1</sup> to 260 °C and held at this temperature for 9 minutes, giving a total run time of 19.5 minutes. Injection temperature was 260 °C and the detector temperature was 260 °C.

## S1.2 – OME3 (2,4,6,8-tetraoxanonane, CH<sub>3</sub>O(CH<sub>2</sub>O)<sub>3</sub>CH<sub>3</sub>)

### APCI-MS

# Analysis Information

Analysis Filename hfs106955jm.d Acquisition Date 31/10/2023 06:23:49  
 Method APCL LOW MASS\_oTOF34 METHODS.m Instrument micrOTOF  
 Submission Name jwg71051rm\_3 APCI Positive

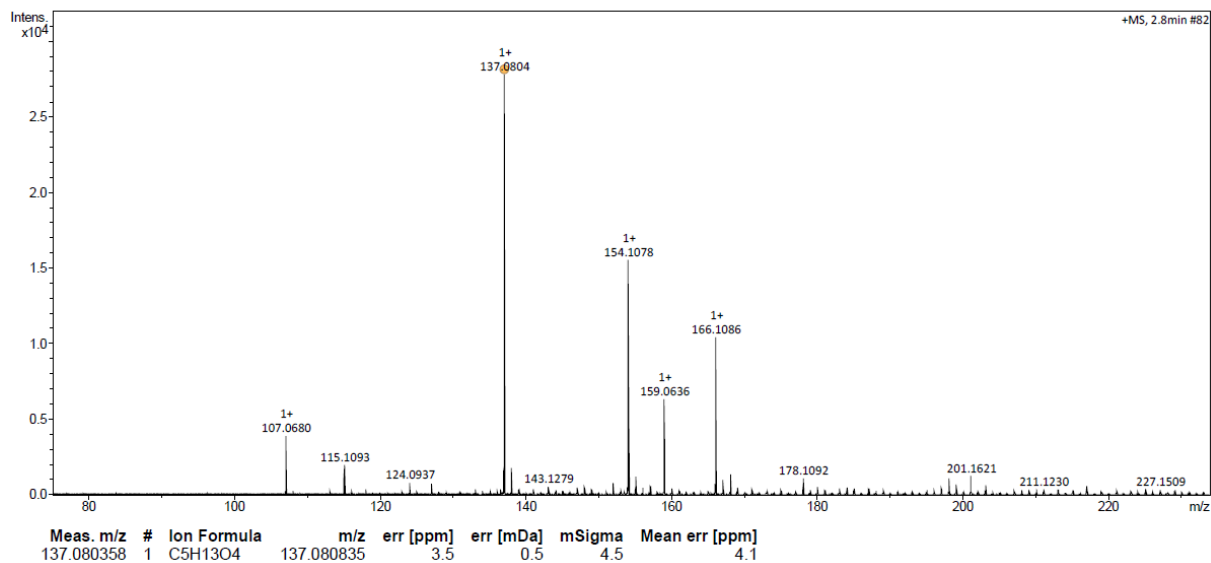

## <sup>1</sup>H NMR

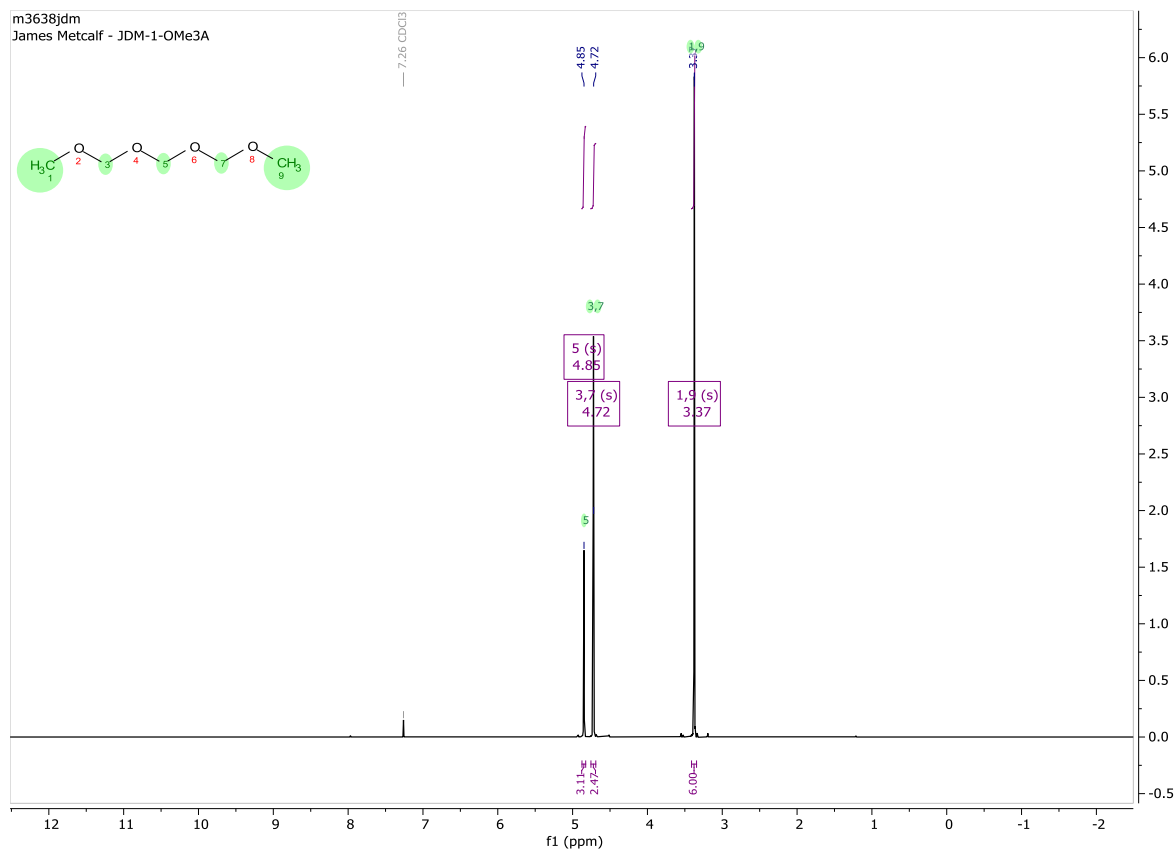

## <sup>13</sup>C NMR (Black) with DEPT-135 overlaid (grey)

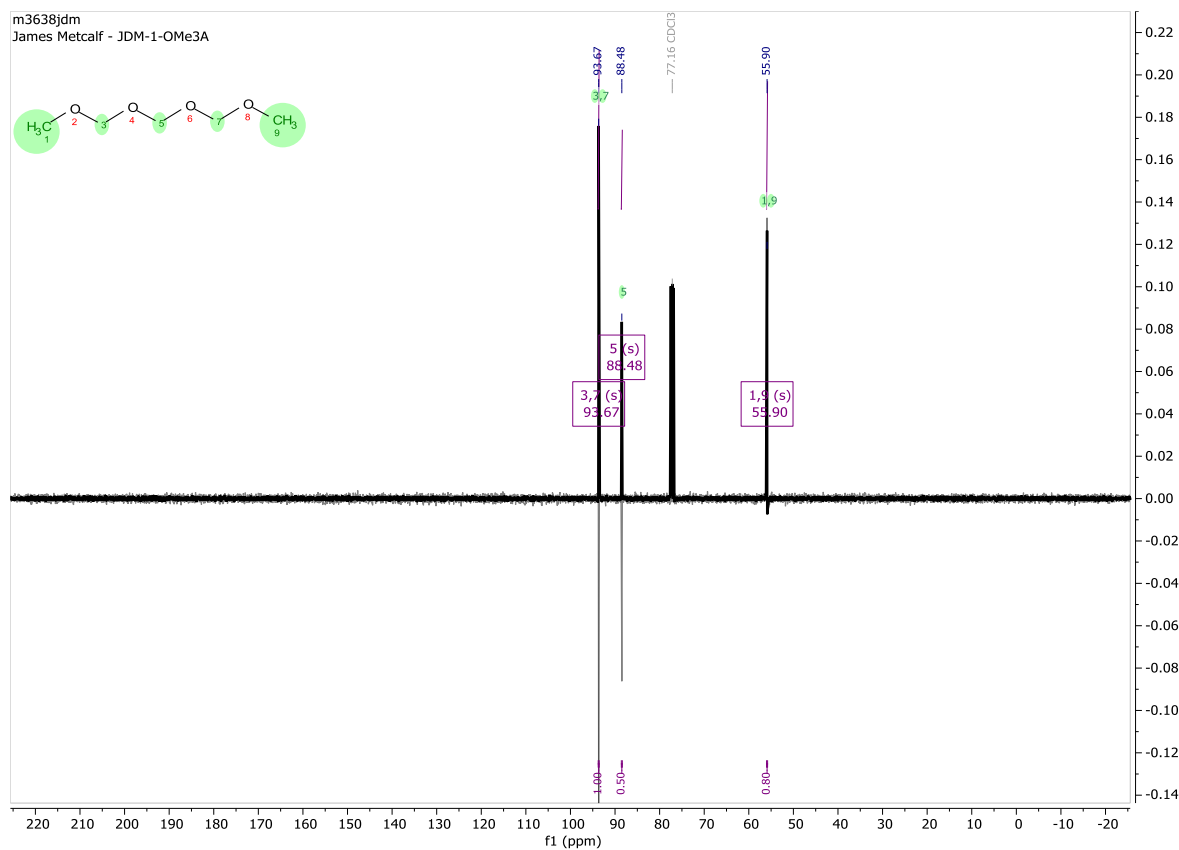

## GC-FID

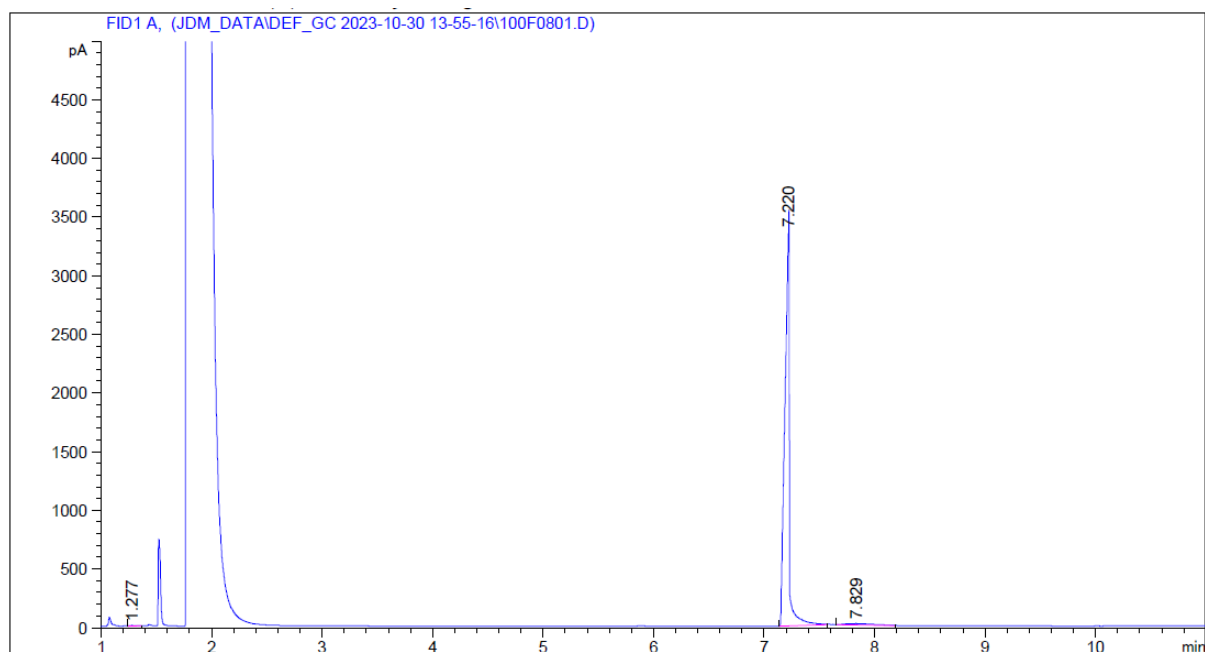

| Peak # | RetTime [min] | Sig | Type | Area [pA*s] | Height [pA] | Area %   |
|--------|---------------|-----|------|-------------|-------------|----------|
| 1      | 1.277         | 1   | VB   | 17.00299    | 4.76025     | 0.16727  |
| 2      | 7.220         | 1   | BB   | 9942.40430  | 3366.13940  | 97.80796 |
| 3      | 7.829         | 1   | BB   | 205.82256   | 12.85588    | 2.02477  |

Totals : 1.01652e4 3383.75554

### S1.3 – OME4 (2,4,6,8,10-Pentaoxaundecane, CH<sub>3</sub>O(CH<sub>2</sub>O)<sub>4</sub>CH<sub>3</sub>)

#### ACPI-MS

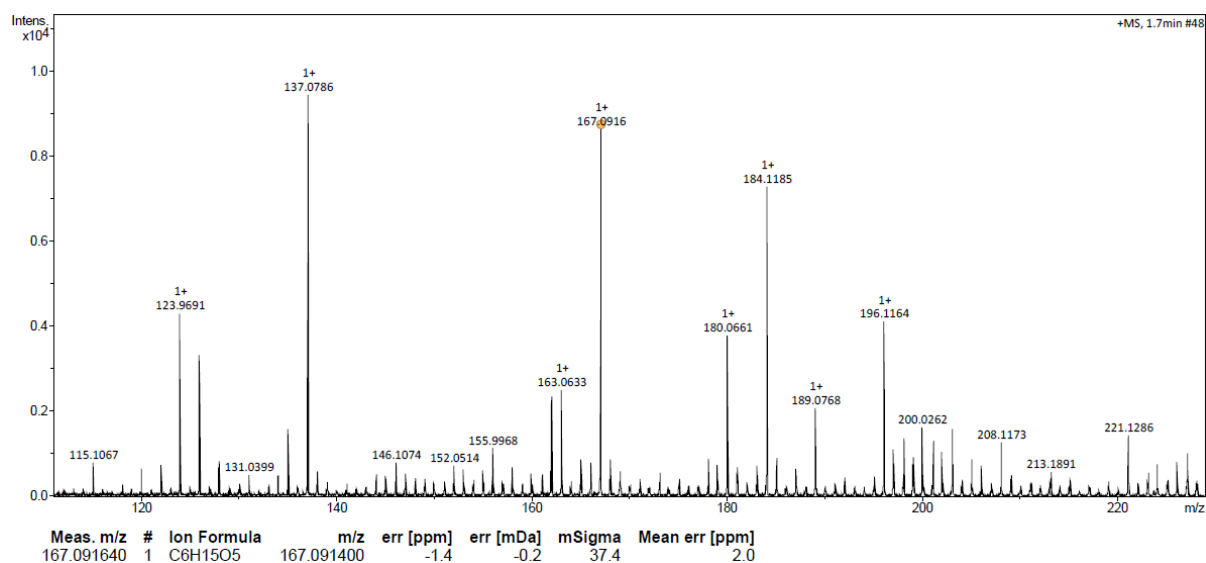

#### <sup>1</sup>H NMR

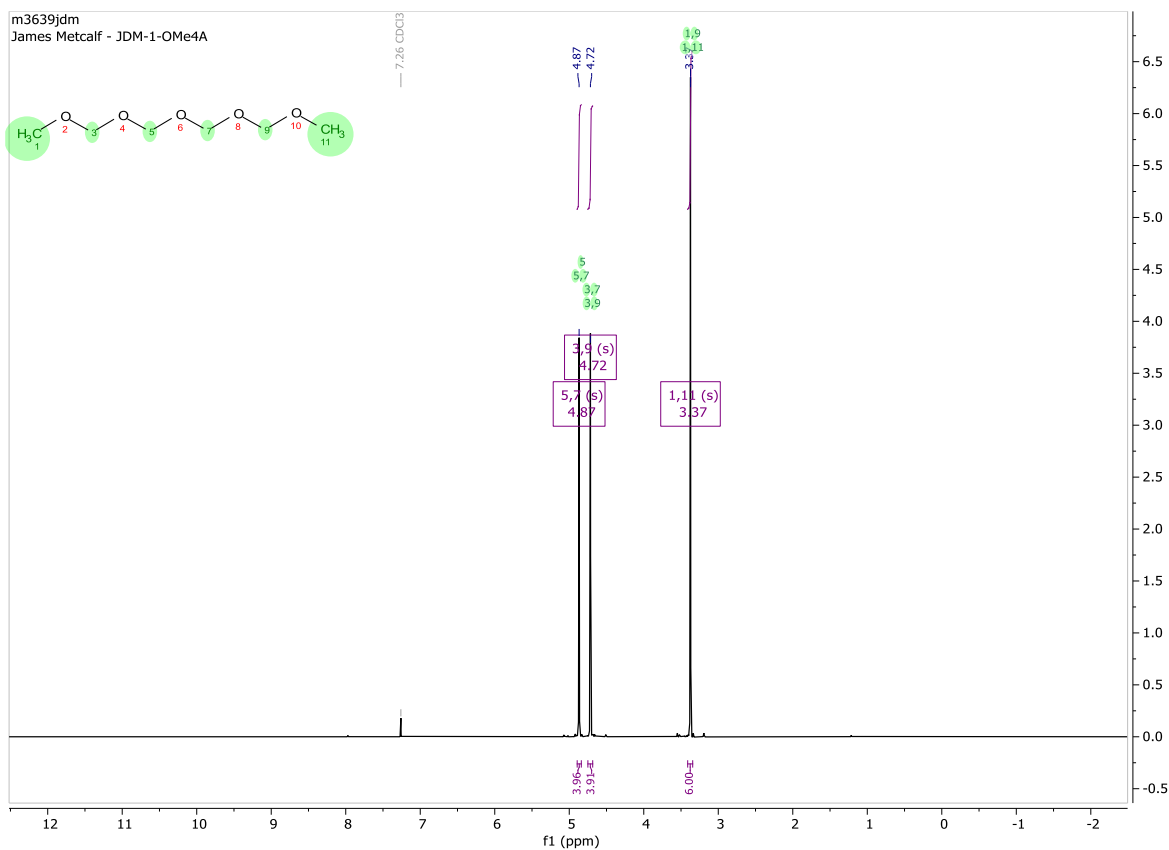<sup>13</sup>C NMR (Black) with DEPT-135 overlaid (grey)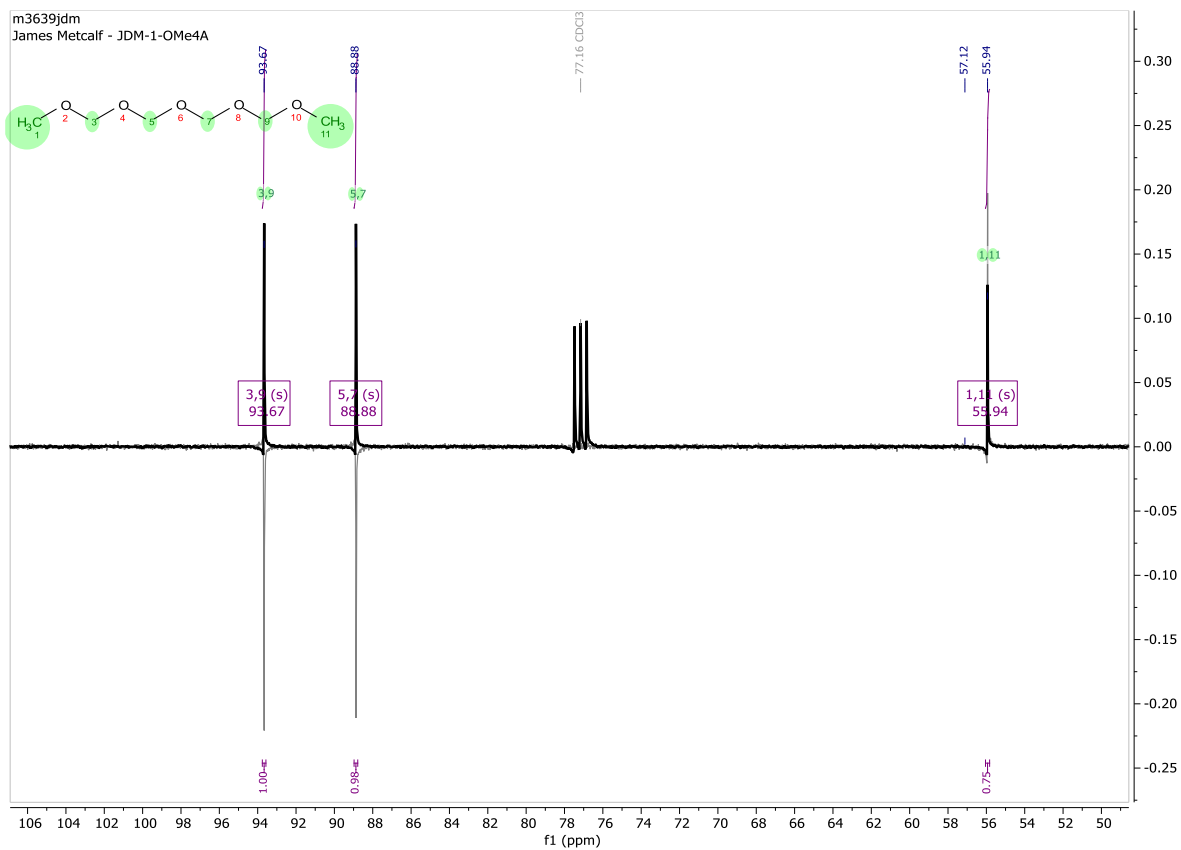

## GC-FID

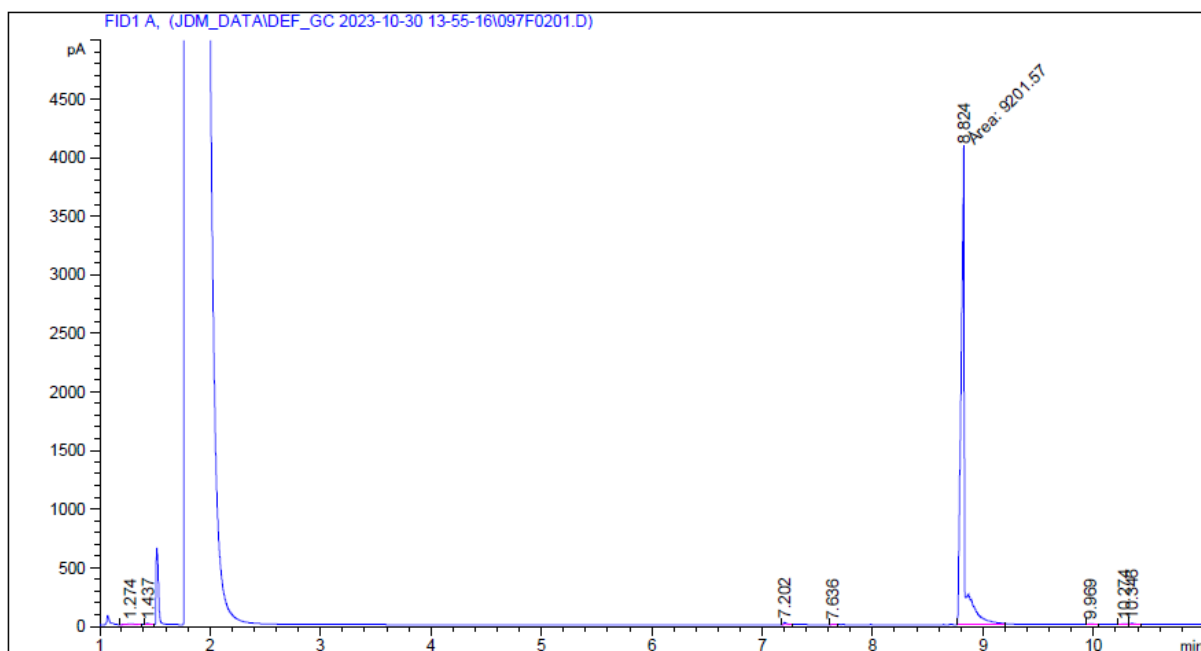

| Peak # | RetTime [min] | Sig | Type | Area [pA*s] | Height [pA] | Area %   |
|--------|---------------|-----|------|-------------|-------------|----------|
| 1      | 1.274         | 1   | BB   | 42.35159    | 7.60741     | 0.45182  |
| 2      | 1.437         | 1   | BV   | 23.36383    | 10.62514    | 0.24925  |
| 3      | 7.202         | 1   | BB   | 32.36141    | 18.21927    | 0.34524  |
| 4      | 7.636         | 1   | BB   | 7.91826     | 4.47685     | 0.08447  |
| 5      | 8.824         | 1   | MM   | 9201.57227  | 4062.82886  | 98.16507 |

| Peak # | RetTime [min] | Sig | Type | Area [pA*s] | Height [pA] | Area %  |
|--------|---------------|-----|------|-------------|-------------|---------|
| 6      | 9.969         | 1   | BB   | 21.11243    | 7.49390     | 0.22523 |
| 7      | 10.274        | 1   | BV   | 21.90153    | 6.98396     | 0.23365 |
| 8      | 10.346        | 1   | VB   | 22.98904    | 8.47070     | 0.24525 |

Totals : 9373.57036 4126.70608

S1.4 – OME5 (2,4,6,8,10,12-hexaoxatridecane,  $\text{CH}_3\text{O}(\text{CH}_2\text{O})_5\text{CH}_3$ )

APCI-MS



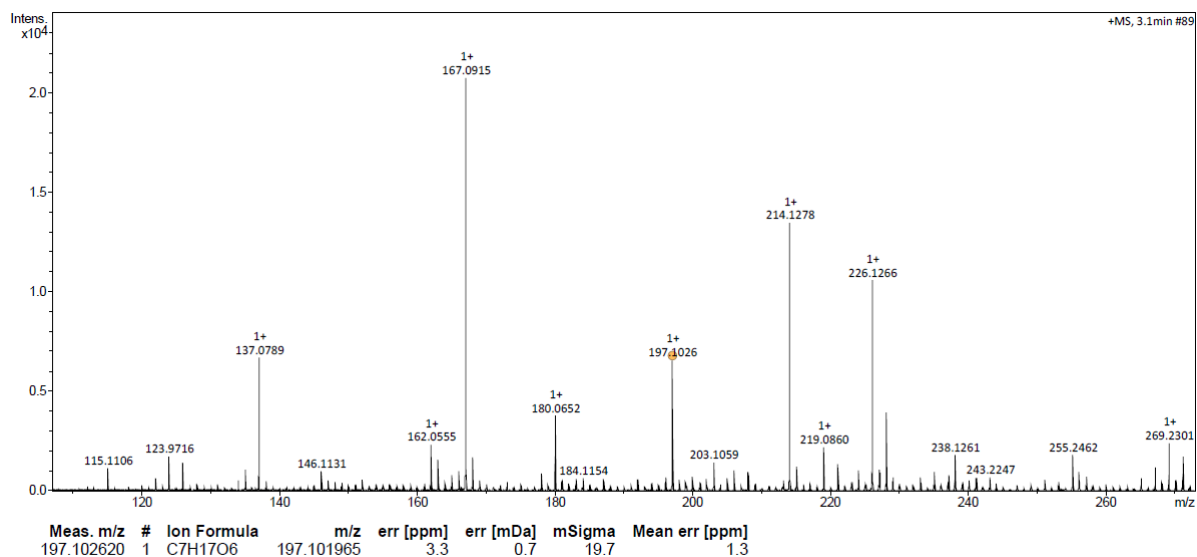

## <sup>1</sup>H NMR

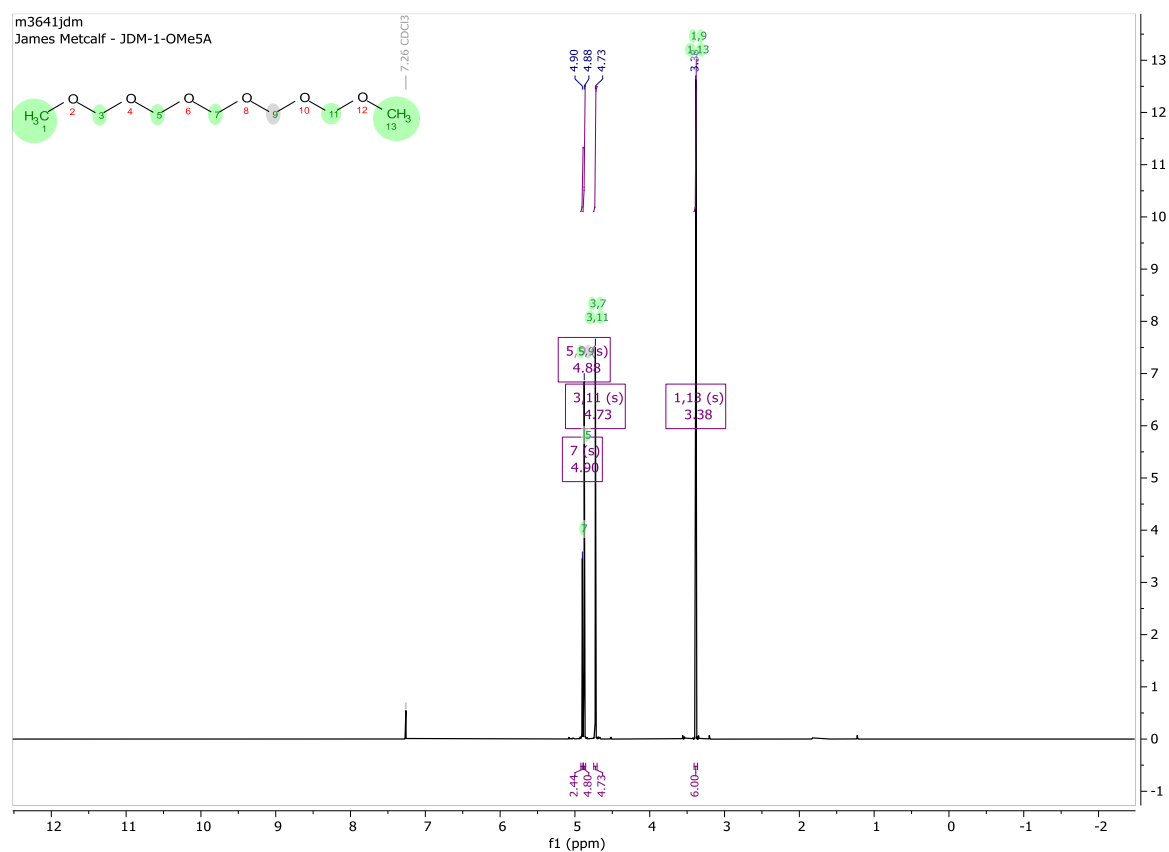

## <sup>13</sup>C NMR (Black) with DEPT-135 overlaid (grey)

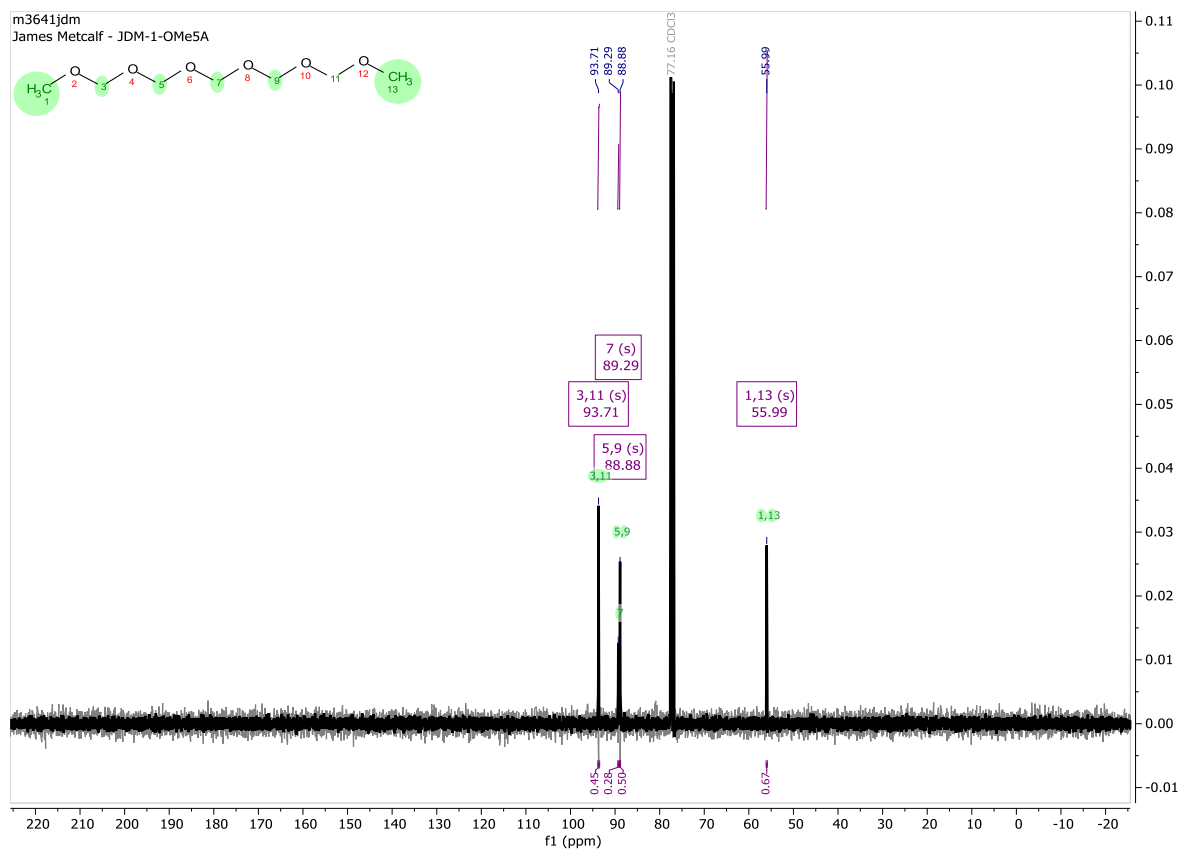

## GC-FID

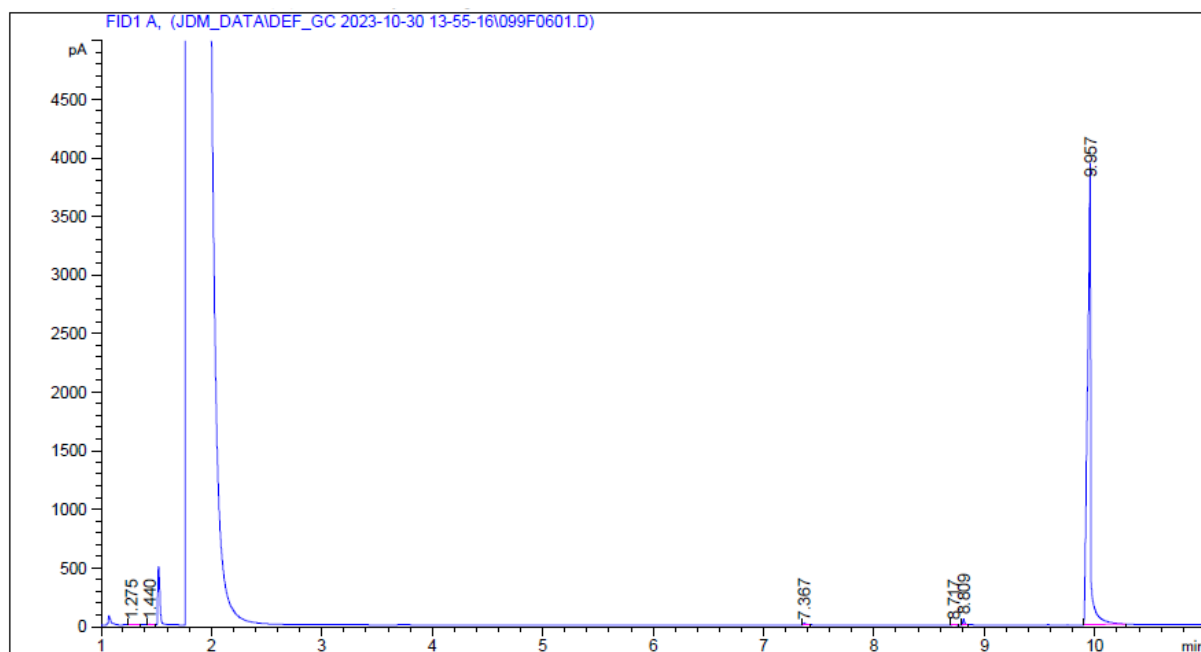

| Peak # | RetTime [min] | Sig | Type | Area [pA*s] | Height [pA] | Area %  |
|--------|---------------|-----|------|-------------|-------------|---------|
| 1      | 1.275         | 1   | VB   | 10.34972    | 4.08246     | 0.12977 |
| 2      | 1.440         | 1   | BB   | 9.11106     | 4.63338     | 0.11424 |
| 3      | 7.367         | 1   | BB   | 23.61317    | 13.32308    | 0.29608 |
| 4      | 8.717         | 1   | BB   | 4.54751     | 3.30458     | 0.05702 |
| 5      | 8.809         | 1   | BB   | 54.93659    | 50.72303    | 0.68884 |

| Peak #   | RetTime [min] | Sig | Type | Area [pA*s] | Height [pA] | Area %   |
|----------|---------------|-----|------|-------------|-------------|----------|
| 6        | 9.957         | 1   | BB   | 7872.70264  | 3778.80347  | 98.71405 |
| Totals : |               |     |      | 7975.26069  | 3854.86999  |          |

## S2 – Relative Rate Plots

### S2.1 – OME3 + OH (R3)

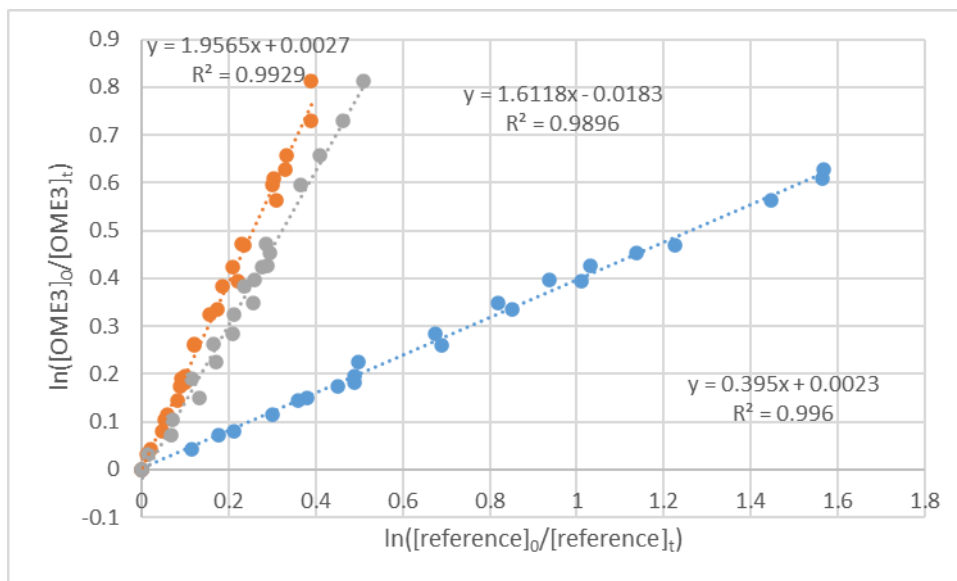

Figure 1: Relative rate plot and fits used to determine  $k_{3RR}$ . Orange data are relative to toluene, grey to cyclohexane and blue to propene.

### S2.2 – OME4 + OH (R4)

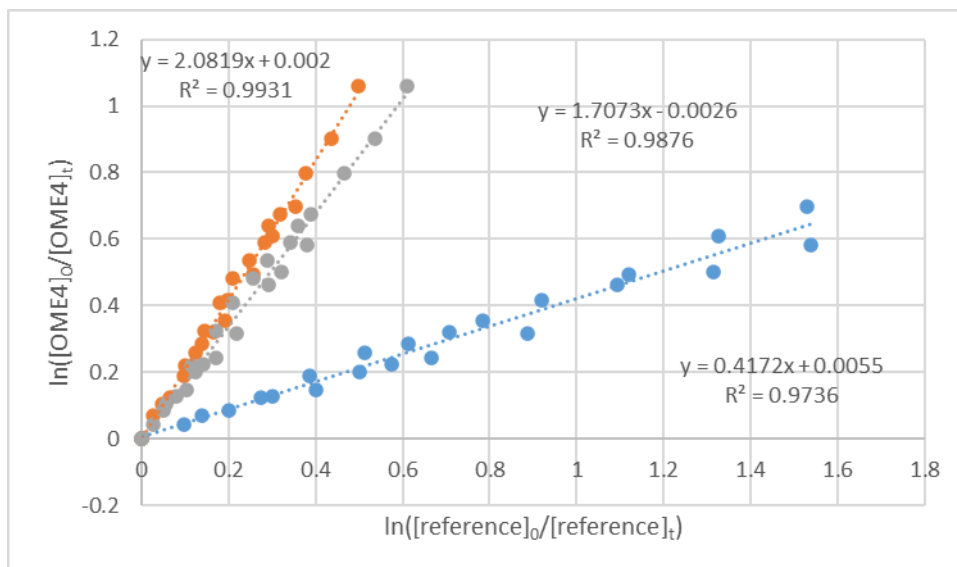

Figure 2: Relative rate plot and fits used to determine  $k_{4RR}$ . Orange data are relative to toluene, grey to cyclohexane and blue to propene.

### S2.3 – OME3 + Cl (R5)

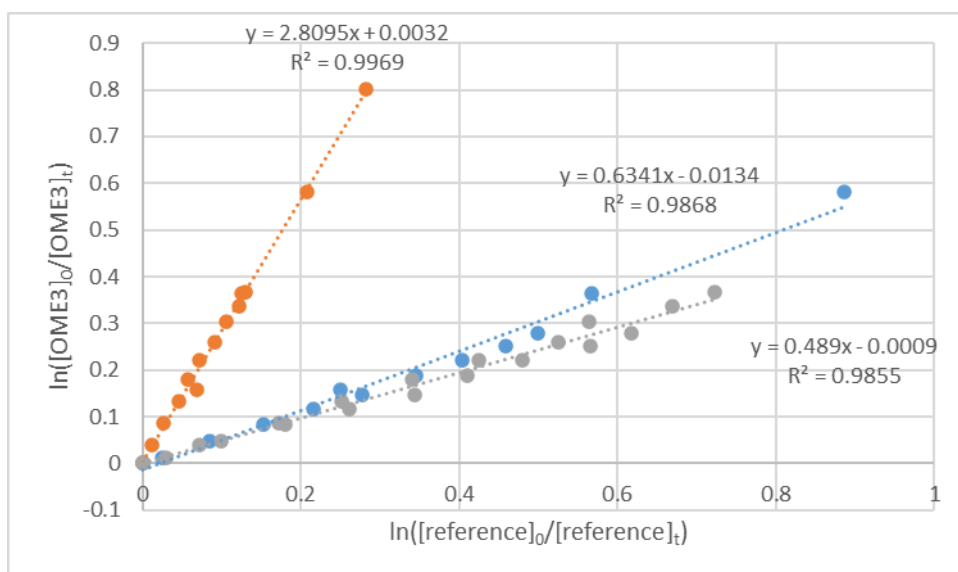

Figure 3: Relative rate plot and fits used to determine  $k_5$ . Orange data are relative to toluene, grey to cyclohexane and blue to propene.

### S2.4 – OME4 + Cl (R6)

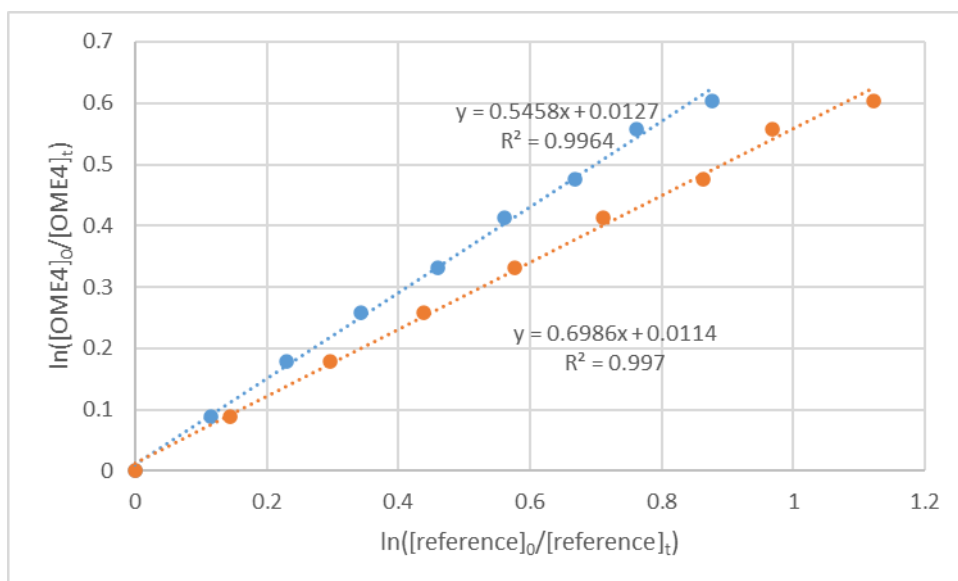

Figure 4: Relative rate plot and fits used to determine  $k_6$ . Orange data are relative to toluene and blue to propene.

## S3 – Gaussian Estimated Spectra

Raw data and Gaussian Files are provided in a separate .zip file (see below, S5a).

### S3.1 – OME3 Estimated Spectrum

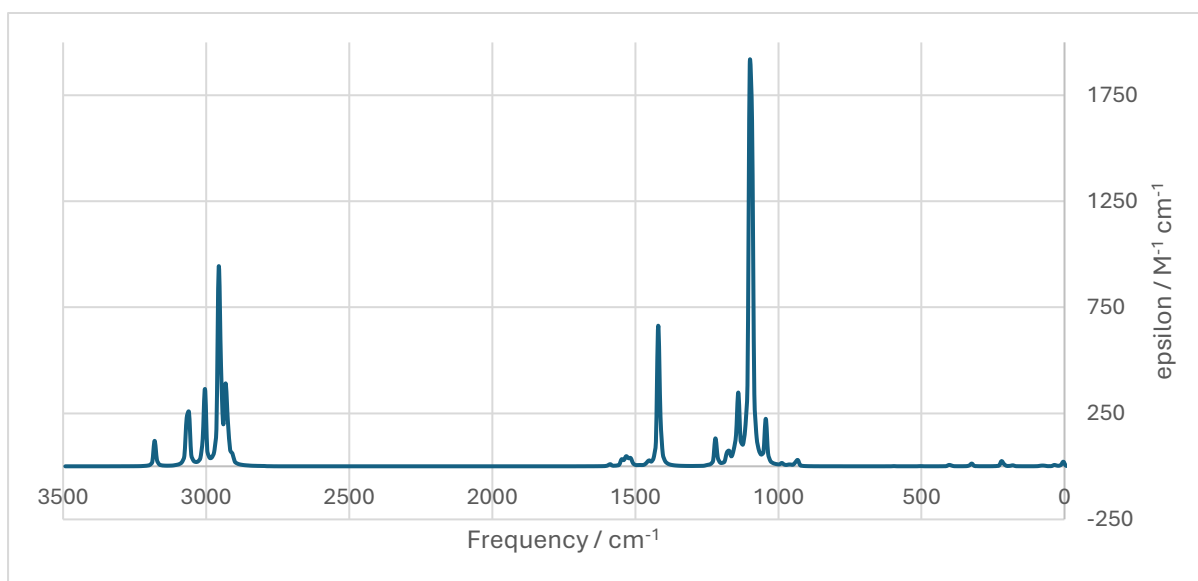

Figure 5: IR spectrum predicted for OME3 by Gaussian calculations

Table 1: IR peaks predicted by Gaussian calculations for OME3

| Peak Table                   |                                            |
|------------------------------|--------------------------------------------|
| Frequency / cm <sup>-1</sup> | epsilon / M <sup>-1</sup> cm <sup>-1</sup> |
| 5.5408                       | 5176.611763                                |
| 33.3311                      | 294.3175651                                |
| 72.5355                      | 81.56387338                                |
| 85.636                       | 31.65951784                                |
| 182.3784                     | 36.53443352                                |
| 217.5926                     | 177.9907444                                |
| 267.3563                     | 0.001492165                                |
| 325.8053                     | 54.81230201                                |
| 400.8943                     | 29.62087585                                |
| 503.2738                     | 2.879840107                                |
| 594.5938                     | 1.806183951                                |
| 934.9269                     | 55.31486613                                |
| 960.1656                     | 8.24167068                                 |
| 986.5033                     | 12.36284438                                |
| 1043.5712                    | 226.8055653                                |
| 1096.2987                    | 3686.426994                                |
| 1114.4314                    | 30.51280373                                |
| 1121.7742                    | 3.649504158                                |
| 1139.3457                    | 315.3367319                                |
| 1148.762                     | 66.26549926                                |
| 1158.0958                    | 33.46717302                                |
| 1175.865                     | 101.2653125                                |
| 1218.6486                    | 38.43332872                                |
| 1218.8159                    | 92.45671176                                |

|           |             |
|-----------|-------------|
| 1242.7177 | 0.691481419 |
| 1418.2064 | 647.8465771 |
| 1454.942  | 20.45394855 |
| 1487.1334 | 1.719820609 |
| 1504.5801 | 0.08511322  |
| 1514.4092 | 26.5457695  |
| 1528.6124 | 52.76474184 |
| 1543.5322 | 14.14209935 |
| 1545.6278 | 20.4873656  |
| 1580.3213 | 0.397848861 |
| 1590.0912 | 8.484384526 |
| 2910.3354 | 16.55834059 |
| 2917.0798 | 2.496963492 |
| 2929.2599 | 197.2055599 |
| 2945.8526 | 66.6314162  |
| 2954.2031 | 423.9984144 |
| 3005.574  | 111.9420842 |
| 3005.9047 | 47.62105925 |
| 3063.7689 | 178.7869234 |
| 3179.0678 | 14.22674857 |
| 3179.1114 | 31.37860432 |

### S3.2 – OME4 Estimated Spectrum

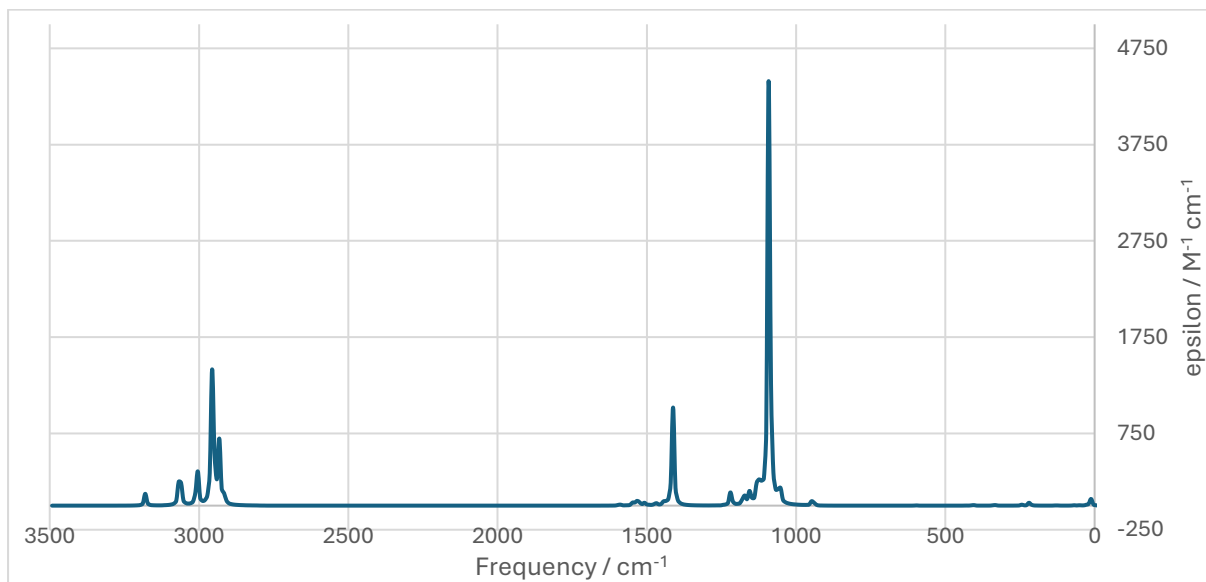

Figure 6: IR spectrum predicted for OME4 by Gaussian calculations

Table 2: IR peaks predicted by Gaussian calculations for OME4

| Peak Table                   |                                            |
|------------------------------|--------------------------------------------|
| Frequency / cm <sup>-1</sup> | epsilon / M <sup>-1</sup> cm <sup>-1</sup> |
| 12.7617                      | 6505.071373                                |

|           |             |
|-----------|-------------|
| 25.5234   | 275.9226131 |
| 43.8872   | 0.009090116 |
| 49.6301   | 94.37723241 |
| 69.1487   | 61.07383194 |
| 128.0174  | 31.15358206 |
| 218.1262  | 1.260139683 |
| 218.2257  | 159.6357115 |
| 218.3476  | 25.82402682 |
| 244.0112  | 43.92386515 |
| 335.3588  | 32.5198434  |
| 407.059   | 24.12598559 |
| 430.9758  | 2.35304353  |
| 566.8888  | 0.064039925 |
| 598.0605  | 5.624614707 |
| 943.4756  | 11.86025453 |
| 945.1199  | 70.84397566 |
| 988.8316  | 0.066165075 |
| 1002.6586 | 0.278517352 |
| 1055.2115 | 236.8697792 |
| 1090.7364 | 5120.250489 |
| 1116.7372 | 109.1047945 |
| 1120.1316 | 0.005342315 |
| 1127.1958 | 9.238787939 |
| 1128.0724 | 352.7879203 |
| 1138.5432 | 0.000350395 |
| 1153.5046 | 84.00043041 |
| 1157.437  | 66.7746008  |
| 1162.1768 | 3.622865309 |
| 1172.0157 | 0.000680775 |
| 1175.0422 | 124.6059652 |
| 1218.557  | 90.65182768 |
| 1219.107  | 45.60636161 |
| 1241.1976 | 0.714505926 |
| 1249.2553 | 0.01724447  |
| 1412.5776 | 849.3125684 |
| 1440.7442 | 36.26759643 |
| 1470.611  | 20.86293286 |
| 1494.0276 | 2.664088523 |
| 1506.7669 | 19.81583676 |
| 1515.6839 | 2.141194995 |
| 1528.7962 | 53.15191115 |
| 1543.8095 | 21.95007827 |
| 1545.0607 | 15.60270777 |
| 1567.32   | 0.13948586  |

|           |             |
|-----------|-------------|
| 1576.232  | 0.206274132 |
| 1584.5593 | 0.652076527 |
| 1591.3916 | 11.29290703 |
| 2910.6342 | 1.062511002 |
| 2914.6841 | 30.59042866 |
| 2923.1519 | 6.016129918 |
| 2932.1836 | 251.1394265 |
| 2946.8212 | 0.00013538  |
| 2947.2806 | 104.5310754 |
| 2956.5597 | 536.4903182 |
| 3005.8779 | 124.0482239 |
| 3006.0499 | 37.15041429 |
| 3064.0593 | 0.000390599 |
| 3064.1086 | 178.1075211 |
| 3179.6946 | 11.01932225 |
| 3179.7178 | 33.75743761 |

## S4 – COSMO-RS Validation

COSMO Files are provided in a separate .zip file (S5).

To the best of our knowledge,  $k_{OH}$  estimation using the COSMOTermX software is carried out as described by Klamt (Klamt, 1993, 1996) however there is little publicly available information describing what, if any modifications have been made since its implementation into the current software package. In order to investigate the accuracy of the COSMO-RS method of VOC + OH rate constant estimation it's estimates for a series of oxygenated VOCs were compared to their IUPAC recommended values (Atkinson et al., 2006; Mellouki et al., 2021), (figure 5). A linear fit of the data, shown in Table 3 gives equation 1:

$$k_{COSMO-RS} = (0.81 \pm 0.10)k_{IUPAC} + (0.47 \pm 2.43) \times 10^{-12} \quad (1)$$

Where N = 27 and  $R^2 = 0.741$ .



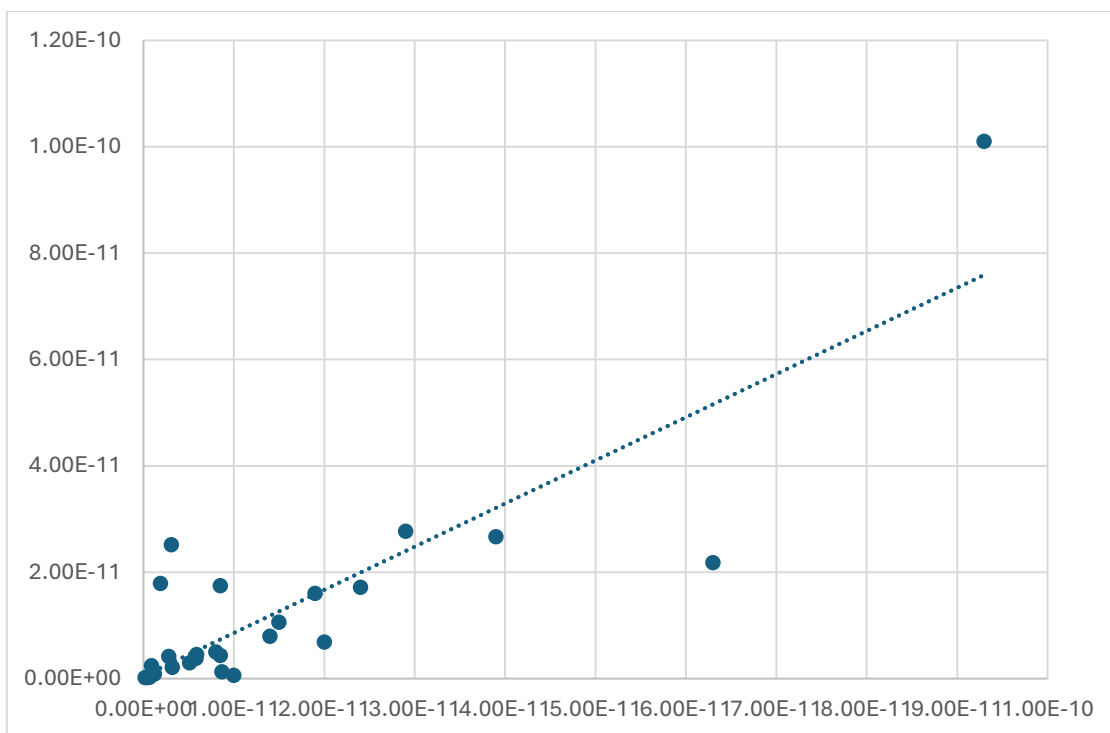

Figure 7: A plot of IUPAC recommended rate constants for a series of oxygenates (table 3) against their values estimated via the COSMO-RS method.

Table 3: Estimated and IUPAC recommended values for the OH rate constants of a series of saturated VOCs.

| Compound                   | Estimated | IUPAC Recommended |
|----------------------------|-----------|-------------------|
| acetaldehyde               | 1.06E-11  | 1.50E-11          |
| propanal                   | 1.60E-11  | 1.90E-11          |
| propanone                  | 2.11E-13  | 1.80E-13          |
| butanone                   | 1.51E-12  | 1.10E-12          |
| methanol                   | 2.42E-12  | 9.00E-13          |
| ethanol                    | 2.10E-12  | 3.20E-12          |
| propanol                   | 3.81E-12  | 5.80E-12          |
| 2-propanol                 | 2.94E-12  | 5.10E-12          |
| 1-butanol                  | 4.35E-12  | 8.50E-12          |
| 2-butanol                  | 1.26E-12  | 8.70E-12          |
| dimethyl ether             | 4.19E-12  | 2.80E-12          |
| formic acid                | 2.01E-13  | 4.50E-13          |
| acetic acid                | 2.27E-13  | 6.90E-13          |
| propionic acid             | 8.53E-13  | 1.20E-12          |
| 2-hydroxy-2-methylpropanal | 7.96E-12  | 1.40E-11          |
| 2-methyl-3-buten-2-ol      | 2.18E-11  | 6.30E-11          |
| 3-methylfuran              | 1.01E-10  | 9.30E-11          |
| butyraldehyde              | 1.72E-11  | 2.40E-11          |
| formaldehyde               | 1.75E-11  | 8.50E-12          |
| glycolaldehyde             | 5.01E-12  | 8.00E-12          |
| glyoxal                    | 2.52E-11  | 3.10E-12          |
| methacrolein               | 2.77E-11  | 2.90E-11          |

|                            |          |          |
|----------------------------|----------|----------|
| <b>methyl peroxide</b>     | 6.35E-13 | 1.00E-11 |
| <b>hydroxyacetone</b>      | 4.51E-12 | 5.90E-12 |
| <b>methyl vinyl ketone</b> | 6.89E-12 | 2.00E-11 |
| <b>methyl glyoxal</b>      | 1.79E-11 | 1.90E-12 |
| <b>pinonaldehyde</b>       | 2.67E-11 | 3.90E-11 |

## S5a – Details of included files

Included alongside this document are the files associated with Gaussian and COSMO calculations. A brief description of these files, and what is required to open them is detailed here.

### S5a.1 Gaussian Files

Four files are included per calculation, for a total of 8 files:

**.chk** files are Gaussian checkpoint files and are only openable in Gaussian. These can be used to view the minimised structure and view the details of the calculation method and results that are beyond the scope of this paper.

**.gif** files are gaussian input files. These are openable as text files (i.e. in Notepad) and give details on the calculation method and initial structure in Gaussian format. They can also be opened in packages such as Chem3D to view the unoptimised 3D structure

**.LOG** files are gaussian log/output files. They contain full details of the calculations and results and are openable as text files (i.e. in Notepad).

**.txt** files contain raw predicted IR spectra and peak tables

### S5a.2 COSMO-RS Files

Files are divided by type into two folders. One folder contains optimised structures, with two files per compound (describing on the lowest energy gas-phase conformer, which is used in  $k_{\text{OH}}$  calculations). The second folder contains files relating to the  $k_{\text{OH}}$  estimation calculations. Here we have provided overall tabulated results (OMEs.tab). A subfolder then contains the raw output and .tab files for each compound. One quirk of the COSMOTermX software is that 1-octanol, *n*-heptane and water are added to every set of compounds, regardless of if they are needed for the requested calculation. We have included the files corresponding to these compounds for completeness, but they are of no practical importance. All files in this section can be opened as text files (i.e. in Notepad), a total of 25 files are provided.

**.cosmo** files contain the optimised structure and screening charge surface of each molecule.

**.energy** files contain additional energy information for each compound, required by the COSMOTermX software.

**.out** files contain full details of the calculations and results for each compound in the set, analogous to gaussian .LOG files

**.tab** files contain the parameters used for the  $k_{\text{OH}}$  estimation for each compound in the set, with the exception of OMEs.tab, which contains the overall results (see above).
